# Supplementary material for: Comprehensive Genomic Characterization of Marine Bacteria Thalassospira spp. Provides Insights into Their Ecological Roles in Aromatic Hydrocarbon-Exposed Environments
Source: PubMed Central journal article supplement (PMC9604089; doi:10.1128/spectrum.03149-22), 2022-10-03
Supplement: spectrum.03149-22-s0001.pdf [file spectrum.03149-22-s0001.pdf]

**Supplementary Information**

*Microbiology Spectrum*

**Comprehensive genomic characterization of marine bacteria *Thalassospira* spp. provides insights into their ecological roles in aromatic hydrocarbon-exposed environments**

Go Kayama, Robert A. Kanaly, and Jiro F. Mori

Graduate School of Nanobiosciences, Yokohama City University, Japan

**Corresponding author**

Jiro F. Mori

Yokohama City University

[morij@yokohama-cu.ac.jp](mailto:morij@yokohama-cu.ac.jp)

+81 45 787 2336

**Table S1.** Detailed information on the short-read and long-read sequencing results.

**Table S2.** List of the functional genes identified in the putative foreign gene-rich region of the strain GO-4 genome.

**Figure S1.** Chromatograms of aromatic hydrocarbons extracted from the strain GO-4 cultures after 8 days of incubation.

**Table S1.** Detailed information on the short-read and long-read sequencing results.

| <b>Number of reads</b> |                        | <b>Average read length (bp)</b> |                        | <b>Total read size (bp)</b> |                        | <b>Assembly</b>            | <b>Assembly</b>           | <b>Assembly</b> |
|------------------------|------------------------|---------------------------------|------------------------|-----------------------------|------------------------|----------------------------|---------------------------|-----------------|
| DNBSEQ<br>(short-read) | GridION<br>(long-read) | DNBSEQ<br>(short-read)          | GridION<br>(long-read) | DNBSEQ<br>(short-read)      | GridION<br>(long-read) | <b>total size<br/>(bp)</b> | <b>GC content<br/>(%)</b> | <b>coverage</b> |
| 22,517,128             | 68,243                 | 200                             | 17,703                 | 4,503,425,600               | 1,208,089,891          | 4,546,452                  | 54.8                      | 1,256           |

**Table S2.** List of the functional genes identified in the putative foreign gene-rich region of the strain GO-4 genome.

| Gene                                                   | EC        | AA length | Locus           | IMG Gene ID |
|--------------------------------------------------------|-----------|-----------|-----------------|-------------|
| <b>Nitrate reduction</b>                               |           |           |                 |             |
| Nitrate/nitrite transporter NarK                       |           | 889       | 3957161-3959830 | 2963527598  |
| Nitrate reductase alpha subunit NarG                   | 1.7.5.1   | 1246      | 3959898-3963638 | 2963527599  |
| Nitrate reductase beta subunit NarH                    | 1.7.5.1   | 507       | 3963635-3965158 | 2963527600  |
| Nitrate reductase delta subunit NarJ                   |           | 234       | 3965158-3965862 | 2963527601  |
| Nitrate reductase gamma subunit NarI                   | 1.7.5.1   | 231       | 3965874-3966569 | 2963527602  |
| <b>Nitrous oxide reduction</b>                         |           |           |                 |             |
| Nitrous oxidase accessory protein NosD                 |           | 446       | 3977215-3978555 | 2963527616  |
| Nitrous oxide reductase NosZ                           | 1.7.2.4   | 649       | 3978559-3980508 | 2963527617  |
| Nitrous oxide reductase transcriptional regulator NosR |           | 755       | 3980505-3982772 | 2963527618  |
| <b>Isoquinoline degradation</b>                        |           |           |                 |             |
| Isoquinoline 1-oxidoreductase alpha subunit IorA       | 1.3.99.16 | 182       | 4004972-4005520 | 2963527638  |
| Isoquinoline 1-oxidoreductase beta subunit IorB        | 1.3.99.16 | 723       | 4005524-4007695 | 2963527639  |
| <b>Ribose transport system</b>                         |           |           |                 |             |
| Ribose transport system substrate-binding protein RbsB |           | 370       | 4041990-4043102 | 2963527667  |
| Ribose transport system ATP-binding protein RbsA       | 7.5.2.7   | 537       | 4043129-4044742 | 2963527668  |
| Ribose transport system permease protein RbsC          |           | 341       | 4044739-4045764 | 2963527669  |
| Ribose transport system permease protein RbsC          |           | 333       | 4045773-4046774 | 2963527670  |
| Ribose transport system substrate-binding protein RbsB |           | 331       | 4050183-4051178 | 2963527674  |
| Ribose transport system substrate-binding protein RbsB |           | 315       | 4052404-4053351 | 2963527676  |
| Ribose transport system ATP-binding protein RbsA       | 7.5.2.7   | 505       | 4053454-4054971 | 2963527677  |
| Ribose transport system permease protein RbsC          |           | 327       | 4054975-4055958 | 2963527678  |
| Ribose transport system permease protein RbsC          |           | 333       | 4056784-4057785 | 2963527680  |

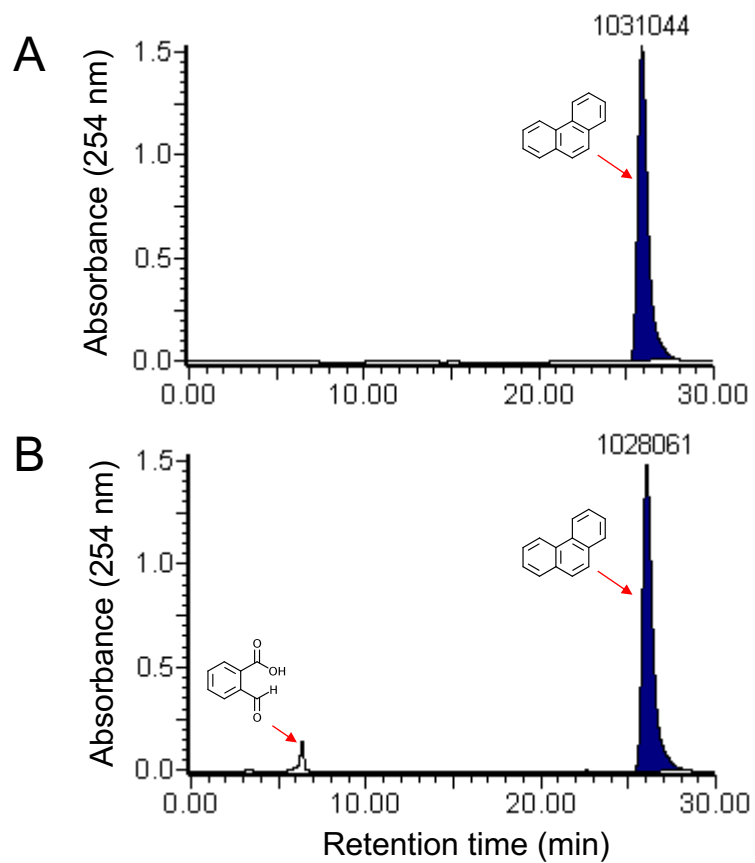

**Figure S1.** Chromatograms of aromatic hydrocarbons extracted from the strain GO-4 cultures after 8 days of incubation: **(A)** strain GO-4 cells exposed to 2-carboxybenzaldehyde and phenanthrene in the same culture and **(B)** the abiotic control culture without bacterial cells. Peak areas for the phenanthrene peaks were shown.
